# Supplementary material
Source: publisher figshare collection journal article supplement (https://frontiersin.figshare.com/ndownloader/files/21884583)
Supplement: Supplementary file [file 21884583]

## *Supplementary Material*

- **Questionnaire**

**ID#**

**1. Which technological devices do you have access to? (check all that apply)**

- 1 ☐ Smartphone
- 2 ☐ Cell phone with no Internet connection
- 3 ☐ Ipad/Tablet
- 4 ☐ Personal laptop computer
- 5 ☐ Personal desktop computer
- 6 ☐ Laptop or desktop computer belonging to a friend, family member, etc.
- 7 ☐ Public computer (e.g., library, community center, etc.)

**2. What are the obstacles that prevent you from attending JAP/SOL clinic appointments? (check all that apply)**

- 1 ☐ I have **physical** difficulties in getting around
- 2 ☐ I have **financial** difficulties in getting around
- 3 ☐ I have difficulties **going outside (anxiety, not wanting to go outside)**
- 4 ☐ I have difficulties **finding time** (busy schedule, studies, work, etc.)
- 5 ☐ I have difficulties **using public transportation** to get around (too far, not enough buses or metros)
- 6 ☐ I have difficulties **finding my way around** (I don't know how to get to the hospital)
- 7 ☐ **I don't have any particular difficulties**
- 2 ☐ Neutral/I do not wish to answer the question

**3. How often do you access the Internet? (only one answer)**

- 1 ☐ Never
- 2 ☐ Irregular access
- 3 ☐ Once per month
- 4 ☐ At least once a week
- 5 ☐ Every day

**4. How do you access the Internet? (check all that apply)**

- 1 ☐ Cell phone plan
- 2 ☐ Home Internet plan
- 3 ☐ At school or in an educational institution
- 4 ☐ At work
- 5 ☐ In cafés, public spaces (e.g., library)

**5. Generally, to what extent are you SATISFIED with the outpatient SERVICES RECEIVED from the JAP/SOL team? (only one answer)**

- 1 ☐ Very unsatisfied
- 2 ☐ Somewhat unsatisfied

- ☐ 3 Moderately satisfied  
☐ 4 Very satisfied  
☐ 5 I do not know  
☐ -2 I do not wish to answer the question

**6. Generally, to what extent do you consider the OUTPATIENT SERVICES TO BE FLEXIBLE (i.e. adapt to your schedule, adjust to your needs, etc.)? (only one answer)**

- ☐ 1 Not at all flexible  
☐ 2 Somewhat flexible  
☐ 3 Moderately flexible  
☐ 4 Very flexible  
☐ 5 I do not know  
☐ -2 I do not wish to answer the question

**What method of communication have you used to KEEP IN TOUCH WITH YOUR JAP/SOL clinician during the past year? (only one answer for each question)**

|                                                               | Every day <input type="checkbox"/> 5 | At least once a week <input type="checkbox"/> 4 | At least once a month <input type="checkbox"/> 3 | At least once a year <input type="checkbox"/> 2 | Never <input type="checkbox"/> 1 |
|---------------------------------------------------------------|--------------------------------------|-------------------------------------------------|--------------------------------------------------|-------------------------------------------------|----------------------------------|
| 7. In person (at the clinic)                                  | <input type="radio"/>                | <input type="radio"/>                           | <input type="radio"/>                            | <input type="radio"/>                           | <input type="radio"/>            |
| 8. In person (in the community)                               | <input type="radio"/>                | <input type="radio"/>                           | <input type="radio"/>                            | <input type="radio"/>                           | <input type="radio"/>            |
| 9. Through my parents                                         | <input type="radio"/>                | <input type="radio"/>                           | <input type="radio"/>                            | <input type="radio"/>                           | <input type="radio"/>            |
| 10. Phone                                                     | <input type="radio"/>                | <input type="radio"/>                           | <input type="radio"/>                            | <input type="radio"/>                           | <input type="radio"/>            |
| 11. Text messages (SMS)                                       | <input type="radio"/>                | <input type="radio"/>                           | <input type="radio"/>                            | <input type="radio"/>                           | <input type="radio"/>            |
| 12. Social media (e.g., Facebook, Snapchat)                   | <input type="radio"/>                | <input type="radio"/>                           | <input type="radio"/>                            | <input type="radio"/>                           | <input type="radio"/>            |
| 13. Email                                                     | <input type="radio"/>                | <input type="radio"/>                           | <input type="radio"/>                            | <input type="radio"/>                           | <input type="radio"/>            |
| 14. Videochat (i.e. Skype, Google hangouts, Facetime, others) | <input type="radio"/>                | <input type="radio"/>                           | <input type="radio"/>                            | <input type="radio"/>                           | <input type="radio"/>            |
| 15. Other (please specify)<br>.....                           | <input type="radio"/>                | <input type="radio"/>                           | <input type="radio"/>                            | <input type="radio"/>                           | <input type="radio"/>            |

**16. Generally, to what extent are you satisfied with the METHODS OF COMMUNICATION that you use with the JAP/SOL clinicians?**

**1= absolutely not satisfied and 10 = absolutely satisfied**

|                               |   |   |   |   |   |   |   |   |                            |                      |                                             |
|-------------------------------|---|---|---|---|---|---|---|---|----------------------------|----------------------|---------------------------------------------|
| 1<br>Absolutely not satisfied | 2 | 3 | 4 | 5 | 6 | 7 | 8 | 9 | 10<br>Absolutely satisfied | -1□<br>I do not know | -2□<br>I do not wish to answer the question |
|-------------------------------|---|---|---|---|---|---|---|---|----------------------------|----------------------|---------------------------------------------|

**17. Generally, to what extent are you satisfied with the face-to-face CONSULTATIONS with JAP/SOL clinicians?**

**1= absolutely not satisfied and 10 = absolutely satisfied**

|                               |   |   |   |   |   |   |   |   |                            |                      |                                             |
|-------------------------------|---|---|---|---|---|---|---|---|----------------------------|----------------------|---------------------------------------------|
| 1<br>Absolutely not satisfied | 2 | 3 | 4 | 5 | 6 | 7 | 8 | 9 | 10<br>Absolutely satisfied | -1□<br>I do not know | -2□<br>I do not wish to answer the question |
|-------------------------------|---|---|---|---|---|---|---|---|----------------------------|----------------------|---------------------------------------------|

**For questions 18 to 22, please circle the answer that best reflects your opinion on technology (Internet, cell phones, tablets, etc.) (only one answer for each question)**

|                                                                                                  | 1□<br>Completely disagree | 2□<br>Partially disagree | 3□<br>I do not wish to answer the question | 4□<br>Partially agree | 5□<br>Completely agree |
|--------------------------------------------------------------------------------------------------|---------------------------|--------------------------|--------------------------------------------|-----------------------|------------------------|
| <b>18.</b> Technology plays a central role in daily life                                         |                           |                          |                                            |                       |                        |
| <b>19.</b> Technology enables me to connect with others, the outside world, and to stay informed |                           |                          |                                            |                       |                        |
| <b>20.</b> Technology represents positive progress                                               |                           |                          |                                            |                       |                        |
| <b>21.</b> Technology helps to be integrated with society                                        |                           |                          |                                            |                       |                        |
| <b>22.</b> Technology helps with finding support, assistance, and information                    |                           |                          |                                            |                       |                        |

**Indicate the FREQUENCY with which you use each technology listed below (only one answer).**

|                                                   | <b>23.</b><br>Videochat (e.g.,<br>Skype, Google<br>Hangouts, Facetime,<br>others) | <b>24.</b><br>Text<br>messages | <b>25.</b><br>Internet<br>searches | <b>26.</b><br>Email | <b>27.</b><br>Social<br>media | <b>28.</b><br>Music/videos<br>on the Internet |
|---------------------------------------------------|-----------------------------------------------------------------------------------|--------------------------------|------------------------------------|---------------------|-------------------------------|-----------------------------------------------|
| <input type="checkbox"/> Rarely or Never          |                                                                                   |                                |                                    |                     |                               |                                               |
| <input type="checkbox"/> At least once a<br>month |                                                                                   |                                |                                    |                     |                               |                                               |
| <input type="checkbox"/> At least once a<br>week  |                                                                                   |                                |                                    |                     |                               |                                               |
| <input type="checkbox"/> Every day                |                                                                                   |                                |                                    |                     |                               |                                               |

**For each technology listed below, evaluate YOUR LEVEL OF COMPETENCY (only one answer for each question).**

|                                                                  | <b>29.</b><br>Videochat<br>(Skype,<br>Google<br>Hangouts,<br>Facetime,<br>others) | <b>30.</b><br>Text<br>messages | <b>31.</b><br>Internet<br>searches | <b>32.</b><br>Emails | <b>33.</b><br>Social<br>media | <b>34.</b><br>Music<br>/videos on the<br>Internet |
|------------------------------------------------------------------|-----------------------------------------------------------------------------------|--------------------------------|------------------------------------|----------------------|-------------------------------|---------------------------------------------------|
| <input type="checkbox"/> Incompetent                             |                                                                                   |                                |                                    |                      |                               |                                                   |
| <input type="checkbox"/> Slightly incompetent                    |                                                                                   |                                |                                    |                      |                               |                                                   |
| <input type="checkbox"/> Somewhat competent                      |                                                                                   |                                |                                    |                      |                               |                                                   |
| <input type="checkbox"/> Very competent                          |                                                                                   |                                |                                    |                      |                               |                                                   |
| <input type="checkbox"/> I do not wish to answer<br>the question |                                                                                   |                                |                                    |                      |                               |                                                   |

**35. To what extent would you be favourable towards the idea of communicating using videoconferencing technology with JAP/SOL clinicians as part of your care? (only one answer)**

- 1 ☐ Very unfavourable
- 2 ☐ Somewhat unfavourable
- 3 ☐ Somewhat favourable
- 4 ☐ Very favourable
- 5 ☐ I don't know
- 2 ☐ I do not wish to answer the question

**36. What should be the 2 ESSENTIAL CHARACTERISTICS of a videoconferencing platform? (maximum 2 answers)**

- 1 ☐ Easy to use
- 2 ☐ Good sound quality
- 3 ☐ Confidential and secure
- 4 ☐ Efficient
- 5 ☐ Good image quality
- 6 ☐ Cost
- 7 ☐ Other: \_\_\_\_\_

**37. In your opinion, a videoconferencing tool should be used to (check all that apply):**

- 1 ☐ To replace in-person meetings
- 2 ☐ As a last resort when in-person meetings are impossible
- 3 ☐ In the case of unexpected events or an in an emergency
- 4 ☐ To avoid having to travel to the hospital
- 5 ☐ To facilitate/increase access to care
- 6 ☐ Other: \_\_\_\_\_

**38. WOULD YOU LIKE TO TRY VIDEOCONFERENCING in a future consultation?**

- 1 ☐ No
- 2 ☐ Yes
- 3 ☐ Maybe

**39. Do you have CONCERNS about the use of VIDEOCONFERENCING with the JAP/SOL team? If yes, please specify:**

---

---

---

---

**40. Do you have RECOMMENDATIONS regarding the use of VIDEOCONFERENCING with the JAP/SOL team? If yes, please specify:**

---

---

---

---

THE INFORMATION IN THE NEXT SECTION WILL NOT BE USED TO IDENTIFY THE  
PERSON FILLING OUT THIS SURVEY

41. Age: \_\_\_\_\_

42. Are you:

- ☐ A man  
☐ A woman

43. Which of the following options best describes your current living situation? (check all that apply)

- ☐ On the streets  
☐ Shelter / dormitory  
☐ Group home / Youth centre  
☐ With friends  
☐ With family  
☐ Supervised apartment  
☐ Alone in an autonomous apartment  
☐ Apartment with roommates  
☐ I occupy uninhabited or abandoned places

44. Level of education completed

- ☐ Elementary school  
☐ High school, incomplete  
☐ High school diploma  
☐ CEGEP, completed or no  
☐ University, completed or no

45. Which of the following categories best describes your current situation/main activity?  
(only one answer)

- ☐ I do not have a job / I do not go to school  
☐ I have a job  
    Id work:    ☐ Full-time    ☐ Part-time  
☐ Student  
☐ Volunteer  
☐ Other (please specify) .....

46. Are you followed by: ☐ JAP    ☐ SOL

46.1 Since when? Indicate the year and month of your first admission:

.....

|

**We thank you for your participation.**

**Interviewer notes**

---

---

---

---

---

**Interviewer initials:** \_\_\_\_\_
